# Supplementary material
Source: PubMed Central journal article supplement (PMC5710363)
Supplement: jamacardiol-2-1197-s002.pdf [file jamacardiol-2-1197-s002.pdf]

## Supplementary Online Content

Douglas PS, Leon MB, Mack MJ, et al; the PARTNER Trial Investigators. Longitudinal hemodynamics of transcatheter and surgical aortic valves in the PARTNER Trial. *JAMA Cardiol*. Published online September 27, 2017. doi:10.1001/jamacardio.2017.3306

**eAppendix.** Institutional review board approval

**eFigure 1.** CONSORT diagram showing patient flow

**eFigure 2.** Hemodynamic data

**eFigure 3.** Temporal trends in surgical aortic valve replacement

**eFigure 4.** Associations between last mean gradient, Doppler velocity index (DVI), ejection fraction (EF) and stroke volume index (SVI) by vital status/reintervention during each 6 month interval of follow-up

**eTable 1.** Surgical aortic valve replacement patients with available paired echocardiographic data at baseline, first postimplantation, and 5 years

**eTable 2.** Incidence of VARC-2 and other selected cut points for severe aortic stenosis

This supplementary material has been provided by the authors to give readers additional information about their work.

**eAppendix.** Institutional review board approval

| Institution                                                                                              | IRB Affiliation                                                               |
|----------------------------------------------------------------------------------------------------------|-------------------------------------------------------------------------------|
| Division of Cardiology, Barnes-Jewish Hospital, Washington University School of Medicine                 | Washington University Institutional Review Board                              |
| Division of Cardiac Surgery, Brigham and Women’s Hospital                                                | Partners Human Research Office Institutional Review Board                     |
| Cedars-Sinai Medical Center                                                                              | Cedars-Sinai Medical Center Institutional Review Boards                       |
| The Cleveland Clinic Foundation Cardiovascular Medicine                                                  | Cleveland Clinic Foundation Institutional Review Board                        |
| Interventional Cardiology Center for Interventional Vascular Therapy, Columbia University Medical Center | Columbia University Medical Center Institutional Review Board                 |
| Cornell University                                                                                       | Cornell University Institutional Review Board                                 |
| Emory University                                                                                         | Emory University Institutional Review Board                                   |
| NorthShore University Health System                                                                      | Northshore University Health System Research Institute                        |
| Evanston Hospital, Northwestern University                                                               | Northwestern University Human Subject Protection Program                      |
| Intermountain Medical Center                                                                             | Intermountain Healthcare Institutional Review Board                           |
| Laval Hospital, Institut de Cardiologie du Quebec                                                        | Institut Universitaire de Cardiologie et de Pneumologie Research Ethics Board |
| Klinik für Herzchirurgie Leipzig - Zentrum klinische Studien Strümpellstr                                | Medical Faculty University of Leipzig Research Ethics Board                   |
| Massachusetts General Hospital                                                                           | Partners Human Research Office Institutional Review Board                     |
| Mayo Clinic                                                                                              | Mayo Clinic Institutional Review Board                                        |
| Medical City Dallas Hospital                                                                             | North Texas Institutional Review Board at Medical City                        |
| Ochsner Clinic Foundation                                                                                | Ochsner Clinic Foundation Institutional Review Board                          |
| Scripps Green Hospital                                                                                   | Scripps Office for the Protection of Research Subjects                        |

| Institution                                                    | IRB Affiliation                                                                             |
|----------------------------------------------------------------|---------------------------------------------------------------------------------------------|
| Division of Cardiovascular Diseases, Scripps Memorial Hospital | Scripps Memorial Hospital Institutional Review Board                                        |
| St. Luke's Hospital/Mid-America Heart Institute                | St. Luke's Hospital Institutional Review Board                                              |
| St. Paul's Hospital                                            | Providence Health Care Research Institute Research Ethics Board                             |
| Stanford University Medical Center                             | Stanford Institutional Review Board                                                         |
| University of Miami Hospital                                   | University of Miami Institutional Review Board                                              |
| University of Pennsylvania                                     | University of Pennsylvania Institutional Review Board                                       |
| Department of Surgery, University of Virginia                  | University of Virginia Institutional Review Board for Health Sciences Research              |
| University of Washington                                       | University of Washington Institutional Review Board                                         |
| Washington Hospital Center                                     | MedStar Health Research Institute-Georgetown University Oncology Institutional Review Board |

**eFigure 1.** CONSORT diagram showing patient flow

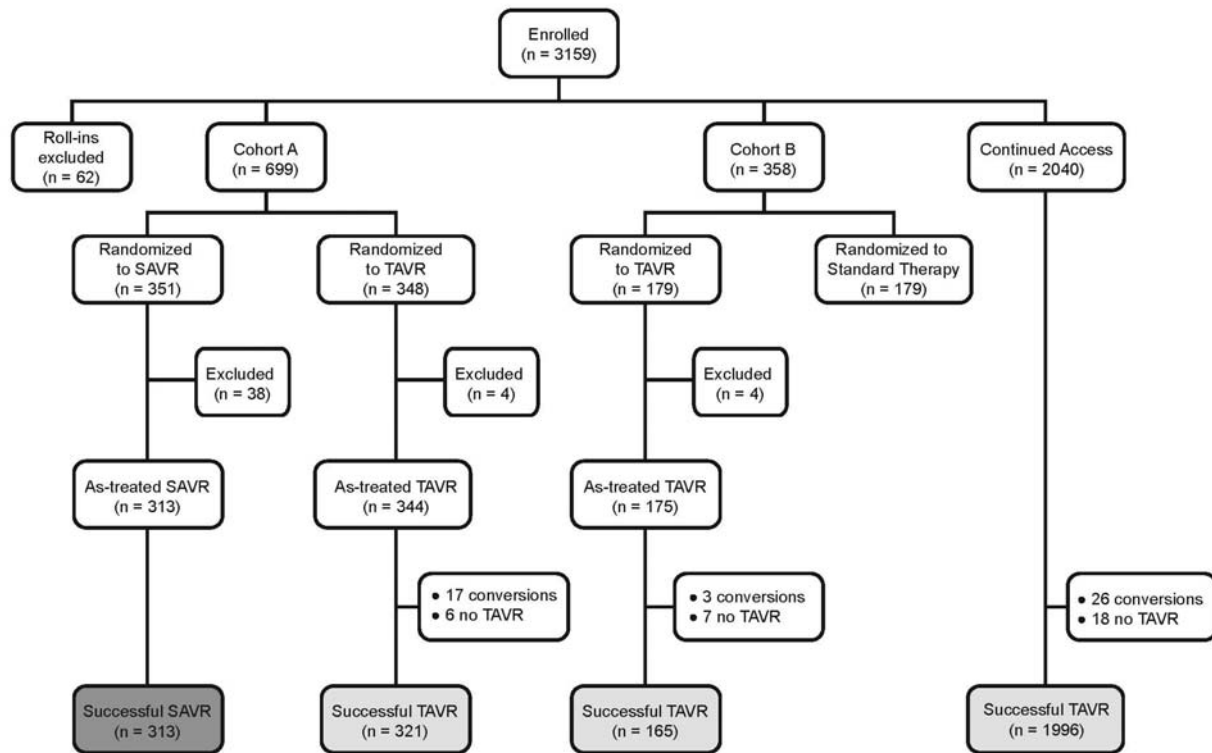

Analyses were conducted on the valve implant population, defined as all patients who received and retained the valve to which they were randomized, or assigned in the case of continued access.

**eFigure 2.** Hemodynamic data

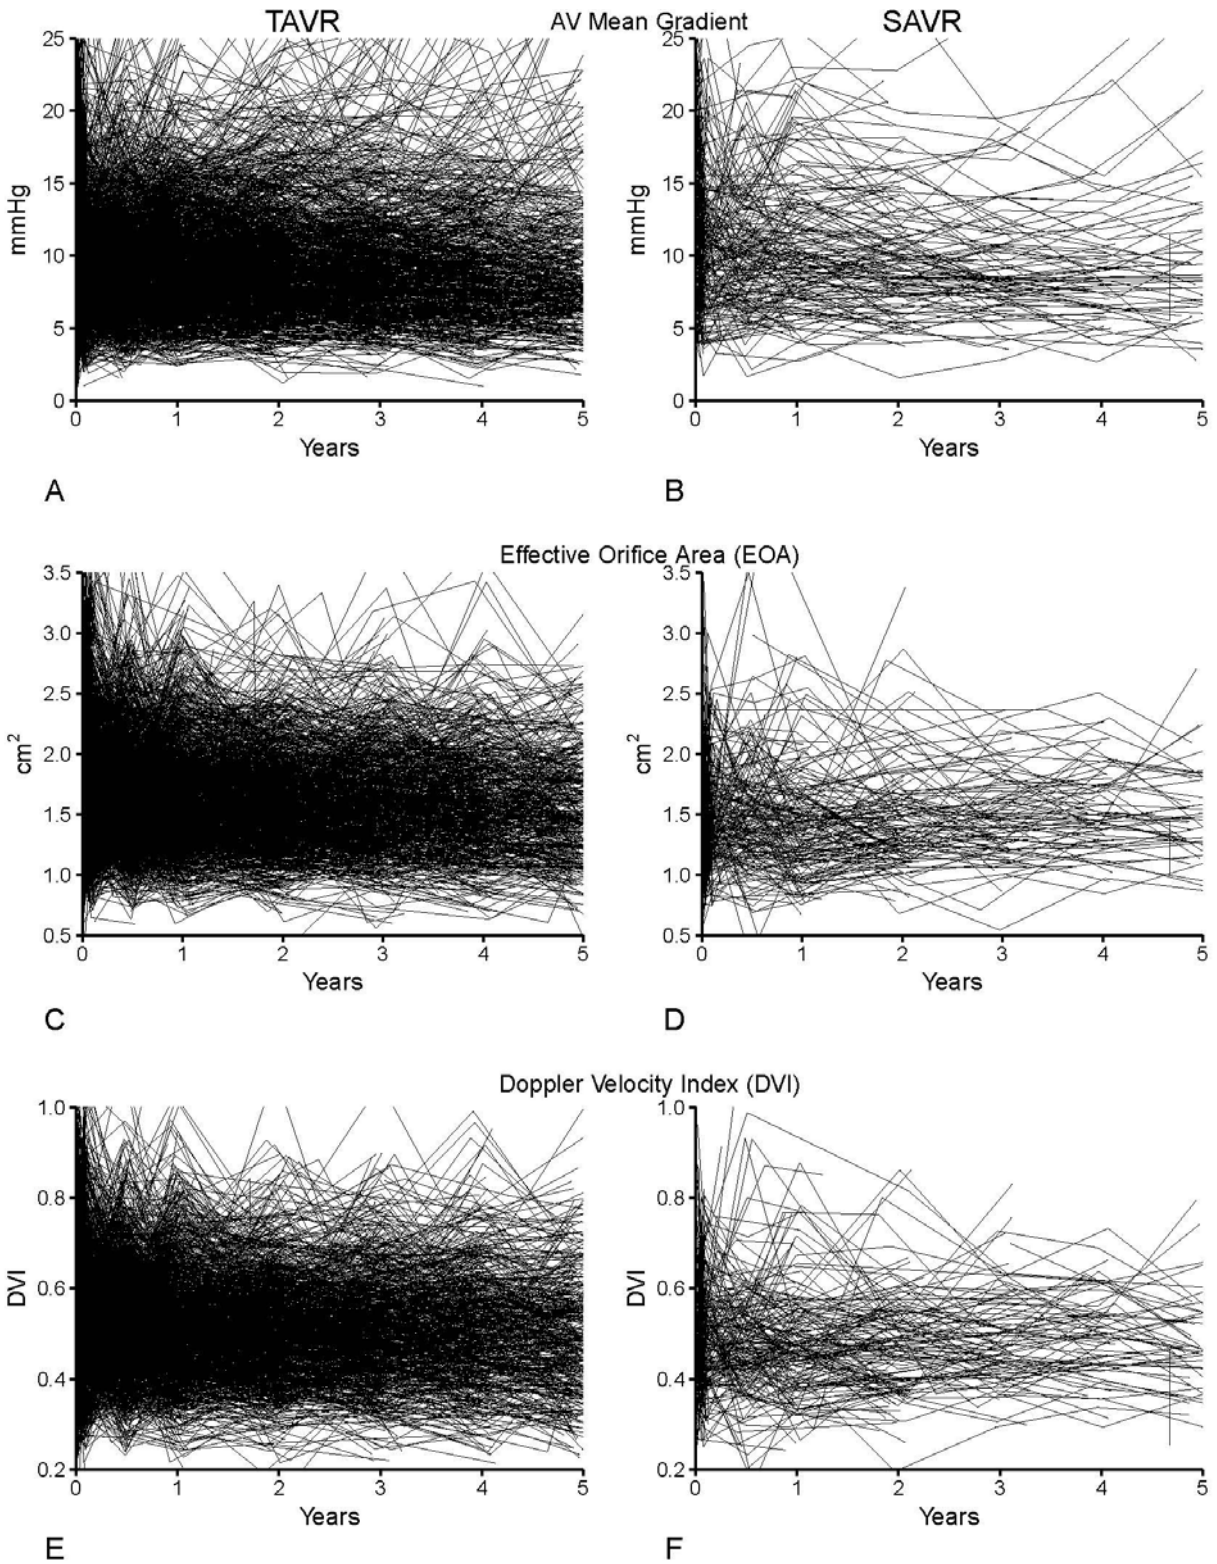

Lines represent observed patient profiles.

**eFigure 3.** Temporal trends in surgical aortic valve replacement

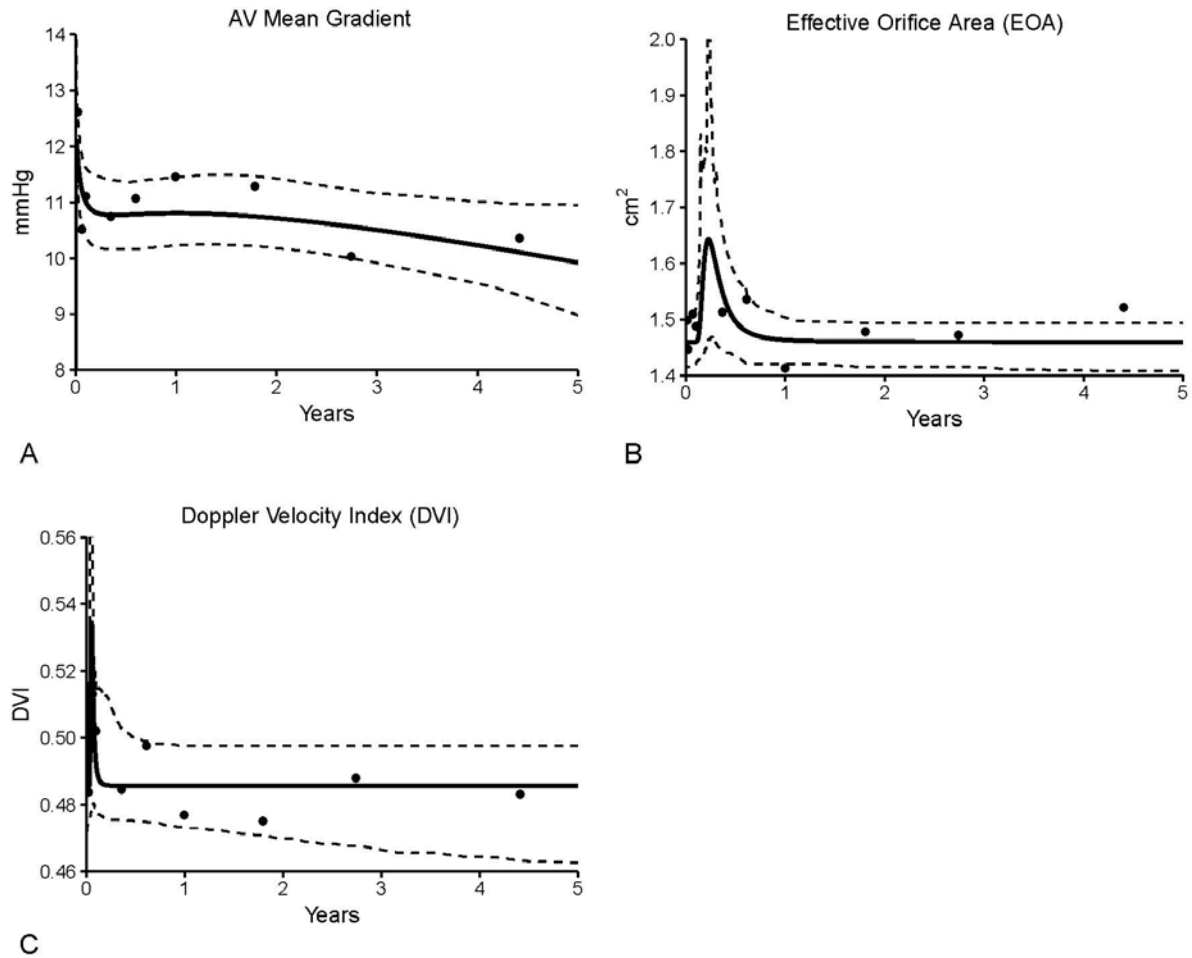

Solid line represents the parametric estimate of the temporal trend after procedure, enclosed within 95% confidence bands. Filled circles represent grouped data without regard to the repeated measurements based on time intervals, provided here as a crude verification of the model fit.

- A: Aortic valve (AV) mean gradient
- B: Effective orifice area (EOA)
- C: Doppler velocity index (DVI)

**eFigure 4.** Associations between last mean gradient, Doppler velocity index (DVI), ejection fraction (EF) and stroke volume index (SVI) by vital status/reintervention during each 6 month interval of follow-up

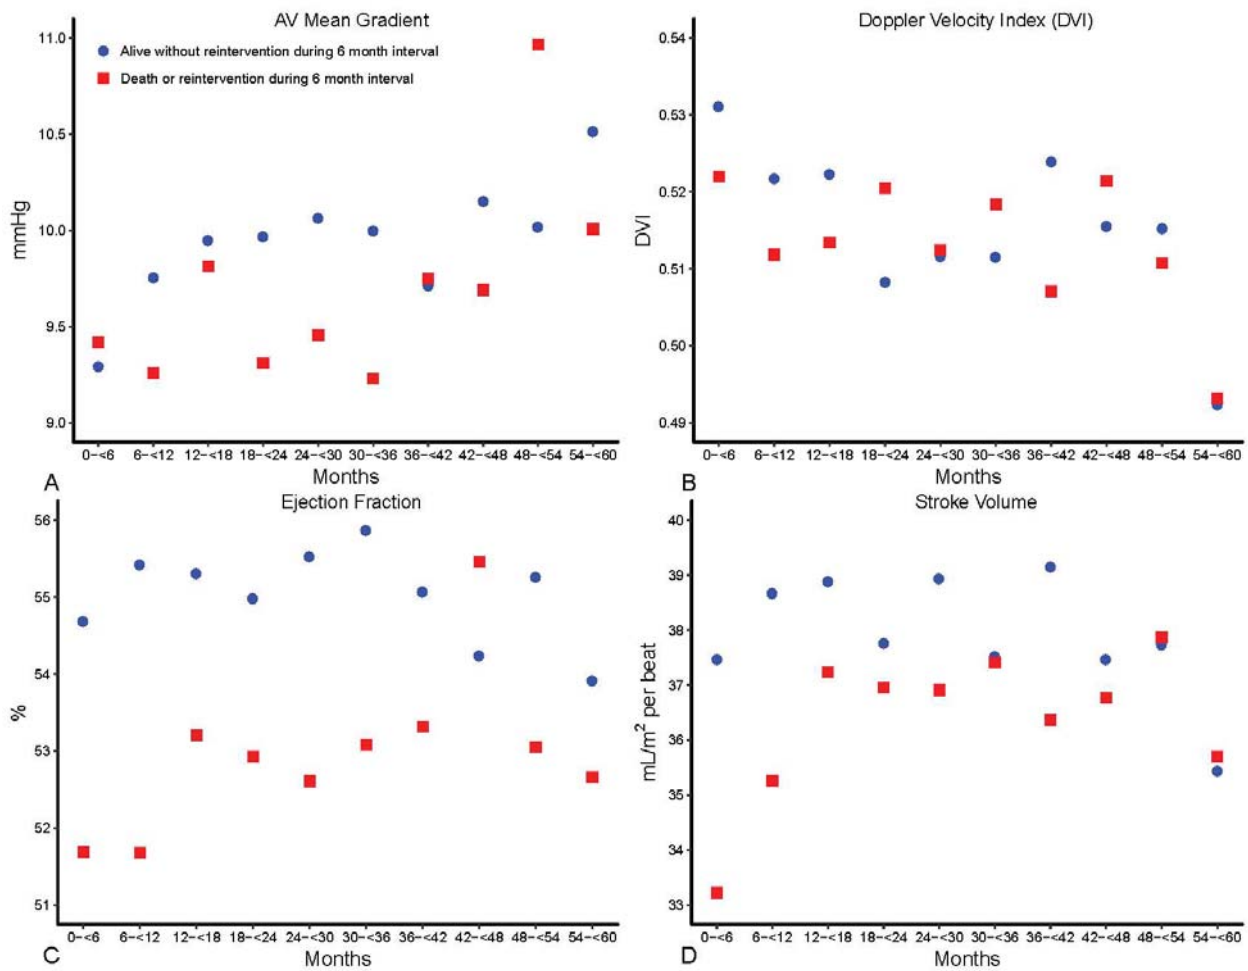

- A. Last mean gradient by vital status/reintervention
- B. DVI by vital status/reintervention
- C. EF by vital status/reintervention
- D. SVI by vital status/reintervention

**eTable 1.** Surgical aortic valve replacement patients with available paired echocardiographic data at baseline, first postimplantation, and 5 years

|                                                  |    | Pre implant        | First post implant (FPI) | 5 years            | P value   |
|--------------------------------------------------|----|--------------------|--------------------------|--------------------|-----------|
|                                                  | N* | N (%) or Mean ± SD | N (%) or Mean ± SD       | N (%) or Mean ± SD | FPI vs 5y |
| LV diameter (Diastolic) (cm)                     | 28 | 4.64 ± 0.80        | 4.63 ± 0.81              | 4.30 ± 0.80        | 0.13      |
| LV diameter (Systolic) (cm)                      | 26 | 3.27 ± 0.96        | 3.46 ± 0.90              | 3.26 ± 0.85        | 0.41      |
| LV mass (gm)                                     | 28 | 280 ± 85.4         | 279 ± 97.2               | 211 ± 57.8         | 0.0069    |
|                                                  |    |                    |                          |                    |           |
| Ejection fraction (%)                            | 41 | 52.8 ± 13.2        | 52.8 ± 11.2              | 54.5 ± 9.41        | 0.50      |
| Stroke volume (mL)                               | 37 | 68.4 ± 16.0        | 62.6 ± 18.3              | 66.2 ± 19.5        | 0.51      |
| Stroke volume index (mL/m <sup>2</sup> )         | 37 | 36.4 ± 11.0        | 33.2 ± 10.8              | 34.2 ± 8.62        | 0.50      |
|                                                  |    |                    |                          |                    |           |
| Peak AV gradient (mmHg)                          | 42 | 76.4 ± 21.8        | 23.9 ± 10.4              | 19.2 ± 9.85        | 0.0097    |
| Mean AV gradient (mmHg)                          | 42 | 45.2 ± 13.2        | 12.4 ± 5.16              | 10.7 ± 5.79        | 0.040     |
| AV area (cm <sup>2</sup> )                       | 37 | 0.65 ± 0.15        | 1.57 ± 0.43              | 1.48 ± 0.35        | 0.30      |
| Doppler Velocity Index (m/s)                     | 40 | 0.20 ± 0.05        | 0.50 ± 0.12              | 0.48 ± 0.10        | 0.44      |
|                                                  |    |                    |                          |                    |           |
| Prosthesis-patient mismatch (moderate), Y/N      | 38 | N/A                | 8 (21)                   | 19 (50)            | 0.031     |
| Prosthesis-patient mismatch (severe), Y/N        | 38 | N/A                | 11 (29)                  | 7 (18)             | 0.031     |
|                                                  |    |                    |                          |                    |           |
| Total aortic regurgitation (moderate or severe)  | 40 | 5 (13)             | 0 (0)                    | 0 (0)              | >0.9      |
| Paravalvular regurgitation (moderate or severe)  | 40 | N/A                | 0 (0)                    | 0 (0)              | >0.9      |
| Transvalvular regurgitation (moderate or severe) | 41 | N/A                | 0 (0)                    | 0 (0)              | >0.9      |
|                                                  |    |                    |                          |                    |           |



**eTable 2.** Incidence of VARC-2 and other selected cut points for severe aortic stenosis

| VARC-2 criterion | Absolute value on any post implant echo |                                        |                                        |                            |           |                           | Change between subsequent echos |                         |                                        |                                        |
|------------------|-----------------------------------------|----------------------------------------|----------------------------------------|----------------------------|-----------|---------------------------|---------------------------------|-------------------------|----------------------------------------|----------------------------------------|
|                  | Mean gradient (N=2,404)                 | Effective Orifice Area (EOA) (N=2,392) | Doppler Velocity index (DVI) (N=2,396) | Transvalvular AR (N=2,418) |           | Paravalvular AR (N=2,416) |                                 | Mean gradient (N=2,229) | Effective Orifice Area (EOA) (N=2,196) | Doppler Velocity index (DVI) (N=2,206) |
|                  | ≥20 mmHg                                | ≤ 1.1 cm <sup>2</sup>                  | <0.35                                  | Moderate AR                | Severe AR | Moderate AR               | Severe AR                       | ↑ > 10 mmHg             | ↓ > 0.4 cm <sup>2</sup>                | ↓ > 0.13                               |
| <b>TAVR</b>      | 192 (8.0%)                              | 605 (25%)                              | 493 (21%)                              | 89 (3.7%)                  | 6 (0.25%) | 419 (17%)                 | 40 (1.7%)                       | 77 (3.5%)               | 1074 (49%)                             | 935 (42%)                              |
|                  |                                         |                                        |                                        |                            |           |                           |                                 |                         |                                        |                                        |
| VARC-2 criterion | Mean gradient (N=292)                   | EOA (N=290)                            | DVI (N=292)                            | Transvalvular AR (N=293)   |           | Paravalvular AR (N=291)   |                                 | Mean gradient (N=247)   | EOA (N=242)                            | DVI (N=243)                            |
|                  | ≥20 mmHg                                | ≤ 1.1 cm <sup>2</sup>                  | <0.35                                  | Moderate AR                | Severe AR | Moderate AR               | Severe AR                       | ↑ > 10 mmHg             | ↓ > 0.4 cm <sup>2</sup>                | ↓ > 0.13                               |
| <b>SAVR</b>      | 38 (13%)                                | 122 (42%)                              | 76 (26%)                               | 2 (0.68%)                  | 0 (0.0%)  | 3 (1.0%)                  | 0 (0.0%)                        | 4 (1.6%)                | 110 (45%)                              | 83 (34%)                               |

Note: For some variables, the VARC-2 cut points specify a range of values. In each of these cases we selected the most restrictive bound.
